# Supplementary material
Source: PubMed Central journal article supplement (PMC6557135)
Supplement: NIHMS1027937-supplement-Supplement.pdf [file NIHMS1027937-supplement-Supplement.pdf]

## **Online-only Supplement**

**Table S1. ICD-9 or CPT Codes Used to Identify Conditions, Therapy and Testing Services**

**Table S2. Final 6-Group Group-Based Trajectory Model for Buprenorphine Refill Patterns**

**Table S3. Nagin's Diagnostic Criteria for Group-Based Trajectory Model**

**Table S4. Factors Associated with Specific Buprenorphine Trajectories: Multinomial Logistic Regression**

**Table S5. Factors Associated with Specific Buprenorphine Trajectories: Multivariate Multinomial Logistic Regression (Sensitivity Analysis Excluding Health Services Use Factors)**

**Figure S1. Sample Size Flow Chart**

**Table S1. ICD-9 or CPT Codes Used to Identify Conditions, Therapy and Testing Services**

| <b>Diseases, Conditions, Treatment</b> | <b>ICD-9 codes or CPT codes</b>                                                                                                                                                                                                                                                                                                                                                                                                                                                                                                                                                                                                                                                                                                                                                                                                             |
|----------------------------------------|---------------------------------------------------------------------------------------------------------------------------------------------------------------------------------------------------------------------------------------------------------------------------------------------------------------------------------------------------------------------------------------------------------------------------------------------------------------------------------------------------------------------------------------------------------------------------------------------------------------------------------------------------------------------------------------------------------------------------------------------------------------------------------------------------------------------------------------------|
| Opioid use disorder                    | ICD-9 codes: 304.0x, 304.7x, 305.5x                                                                                                                                                                                                                                                                                                                                                                                                                                                                                                                                                                                                                                                                                                                                                                                                         |
| Non-opioid use drug disorders          | ICD-9 diagnosis of dependence on illicit substances other than opioids (cocaine, cannabis, amphetamine, hallucinogen, other sedatives and other substances), or a diagnosis of "drug dependence complicating pregnancy/childbirth/puerperium", "antepartum drug dependence", "maternal drug dependence at delivery", or "postpartum drug dependence":<br><br>304.20, 304.21, 304.22, 304.23, 305.60, 305.61, 305.62, 304.30, 304.31, 304.32, 304.33, 305.20, 305.21, 305.22, 304.40, 304.41, 304.42, 304.43, 305.70, 305.71, 305.72, 304.50, 304.51, 304.52, 304.53, 305.30, 305.31, 305.32, 304.10, 304.11, 304.12, 304.13, 305.40, 305.41, 305.42, 304.60, 304.61, 304.62, 304.80, 304.81, 304.82, 304.90, 304.91, 304.92, 304.63, 304.83, 304.93, 305.80, 305.81, 305.82, 305.90, 305.91, 305.92, 648.30, 648.33, 648.31, 648.32, 648.34 |
| Alcohol use disorders                  | ICD-9 codes: 303.90, 303.91, 303.92, 303.93, 305.00, 305.01, 305.02                                                                                                                                                                                                                                                                                                                                                                                                                                                                                                                                                                                                                                                                                                                                                                         |
| Mental health disorders                | Schizophrenia/Schizoaffective: ICD-9 295.0x-295.9x;<br>Bipolar/Manic Disorders: ICD-9 296.0x, 296.1x, 296.4x, 296.5x, 296.6x, 296.7x, 296.80, 296.81, 296.82, 296.89, 301.13; Depression: ICD-9 296.2x, 296.3x, 300.4x, 311                                                                                                                                                                                                                                                                                                                                                                                                                                                                                                                                                                                                                 |
| Tobacco use                            | Tobacco use disorder or tobacco use disorder with complicating pregnancy: ICD-9 codes: 305.1, 649.00, 649.01, 649.02, 649.03, 649.04; Personal history of tobacco use: V15.82                                                                                                                                                                                                                                                                                                                                                                                                                                                                                                                                                                                                                                                               |
| Adverse pregnant history               | History of preterm labor or delivery or other high-risk pregnancy: ICD-9 codes V1321, V2341, V230, V231, V232, V2342, V2349, V235                                                                                                                                                                                                                                                                                                                                                                                                                                                                                                                                                                                                                                                                                                           |
| Methadone opioid agonist therapy       | CPT codes: H0020 and J1230                                                                                                                                                                                                                                                                                                                                                                                                                                                                                                                                                                                                                                                                                                                                                                                                                  |
| Behavioral counseling                  | CPT codes: H0001, H0004, H0005, H0006, H0007, H0008, H0012, H0013, H0014, H0015, H0028, H0047, H0049, H0050, H2034, H2035, H2036, T1006, W0120, W0137, W0138, W0139, W0140, W0141, W0142, W0143, W0144, W0147, W0858, W0859, W1855, W5964, W6039, W9971                                                                                                                                                                                                                                                                                                                                                                                                                                                                                                                                                                                     |
| Urine drug test                        | CPT codes: 82660, H0003, Z2103, Z2104, Z2105, Z2106, G0430, 80104, 80100, 80101, 80299, 83925, H0048, G0431, G0434                                                                                                                                                                                                                                                                                                                                                                                                                                                                                                                                                                                                                                                                                                                          |

**Table S2. Final 6-Group Group-Based Trajectory Model for Buprenorphine Refill Patterns**

| Group (Pattern over time)                                | Estimate | Standard Error | t      | P Value |
|----------------------------------------------------------|----------|----------------|--------|---------|
| <b>Early initiation with persistently high adherence</b> |          |                |        |         |
| Intercept                                                | -1.47    | 0.042          | -35.3  | <0.0001 |
| Linear                                                   | 16.6     | 0.295          | 56.3   | <0.0001 |
| Quadratic                                                | -23.63   | 0.437          | -54.1  | <0.0001 |
| Cubic                                                    | 14.68    | 0.245          | 59.9   | <0.0001 |
| Quartic                                                  | -4.06    | 0.059          | -68.9  | <0.0001 |
| Quintic                                                  | 0.41     | 0.005          | 78.5   | <0.0001 |
| <b>Early initiation with moderate-to-high adherence</b>  |          |                |        |         |
| Intercept                                                | -3.27    | 0.080          | -40.8  | <0.0001 |
| Linear                                                   | -0.08    | 0.378          | -0.20  | 0.84    |
| Quadratic                                                | 9.04     | 0.611          | 14.8   | <0.0001 |
| Cubic                                                    | -6.61    | 0.406          | -16.3  | <0.0001 |
| Quartic                                                  | 1.77     | 0.118          | 15.0   | <0.0001 |
| Quintic                                                  | -0.17    | 0.01           | -13.5  | <0.0001 |
| <b>Early initiation with declining adherence</b>         |          |                |        |         |
| Intercept                                                | -1.22    | 0.037          | -32.9  | <0.0001 |
| Linear                                                   | 6.67     | 0.152          | 44.0   | <0.0001 |
| Quadratic                                                | -5.34    | 0.169          | -31.5  | <0.0001 |
| Cubic                                                    | 1.55     | 0.069          | 22.4   | <0.0001 |
| Quartic                                                  | -0.16    | 0.009          | -17.2  | <0.0001 |
| <b>Early initiation with early discontinuation</b>       |          |                |        |         |
| Intercept                                                | -1.66    | 0.039          | -42.3  | <0.0001 |
| Linear                                                   | 7.97     | 0.235          | 33.9   | <0.0001 |
| Quadratic                                                | -14.78   | 0.434          | -34.1  | <0.0001 |
| Cubic                                                    | 9.66     | 0.325          | 29.8   | <0.0001 |
| Quartic                                                  | -2.85    | 0.104          | -27.4  | <0.0001 |
| Quintic                                                  | 0.32     | 0.012          | 26.4   | <0.0001 |
| <b>Late initiation with moderate-to-high adherence</b>   |          |                |        |         |
| Intercept                                                | -3.32    | 0.018          | -187.1 | <0.0001 |
| Linear                                                   | -17.48   | 0.38           | -46.5  | <0.0001 |
| Quadratic                                                | 27.4     | 0.37           | 75.0   | <0.0001 |
| Cubic                                                    | -13.12   | 0.11           | -115.1 | <0.0001 |
| Quartic                                                  | 2.52     | 0.015          | 164.1  | <0.0001 |
| Quintic                                                  | -0.17    | 0.002          | -68.9  | <0.0001 |
| <b>Late initiation with low-to-moderate adherence</b>    |          |                |        |         |
| Intercept                                                | -4.85    | 0.044          | -109.7 | <0.0001 |
| Linear                                                   | 15.53    | 0.086          | 180.5  | <0.0001 |
| Quadratic                                                | -31.82   | 0.134          | -237.3 | <0.0001 |
| Cubic                                                    | 22.74    | 0.04           | 552.1  | <0.0001 |
| Quartic                                                  | -6.48    | 0.014          | -453.9 | <0.0001 |
| Quintic                                                  | 0.64     | 0.02           | 293.1  | <0.0001 |

**Table s3. Nagin's Diagnostic Criteria for Group-Based Trajectory Model**

| Group                                             | N   | Model Estimate of Group Probability (95% CI) <sup>a</sup> | Proportion Classified in Group <sup>b</sup> | Average Posterior Probability (median, min, max) <sup>c</sup> | No (%) of women with posterior probability <0.95 for the assigned trajectory | Odds Correct Classification <sup>d</sup> |
|---------------------------------------------------|-----|-----------------------------------------------------------|---------------------------------------------|---------------------------------------------------------------|------------------------------------------------------------------------------|------------------------------------------|
| Early initiation with persistently high adherence | 747 | 0.316 (0.298, 0.335)                                      | 31.6299                                     | 0.999 (1.00)                                                  | 5 (0.13%)                                                                    | 0.316                                    |
| Early initiation with moderate-to-high adherence  | 357 | 0.151 (0.137, 0.166)                                      | 15.1190                                     | 0.996 (1.00)                                                  | 6 (1.7%)                                                                     | 0.151                                    |
| Early initiation with declining adherence         | 248 | 0.105 (0.926, 0.118)                                      | 10.5090                                     | 0.996 (1.00)                                                  | 4 (1.6%)                                                                     | 0.105                                    |
| Early initiation with early discontinuation       | 393 | 0.166 (0.151, 0.181)                                      | 16.6412                                     | 0.999 (1.00)                                                  | 1 (0.025%)                                                                   | 0.167                                    |
| Late initiation with moderate-to-high adherence   | 318 | 0.135 (0.121, 0.149)                                      | 13.5104                                     | 0.999 (1.00)                                                  | 2 (0.31%)                                                                    | 0.135                                    |
| Late initiation with low-to-moderate adherence    | 298 | 0.126 (0.112, 0.139)                                      | 12.5904                                     | 0.997 (1.00)                                                  | 3 (1.01%)                                                                    | 0.126                                    |

<sup>a</sup> 95% confidence intervals (CIs), based on parametric bootstrap method, should be reasonably narrow.

<sup>b</sup> Proportion classified in group is based on the maximum posterior probability rule. The values of the proportion classified in the group should be similar to the model estimates of group probabilities in the second column.

<sup>c</sup> Average posterior probability is obtained by averaging the posterior probabilities for a given group for all individuals placed in this group by the maximum posterior probability rule. Acceptable values for this criterion are 0.7 or greater for all groups.

<sup>d</sup> Acceptable values of the odds correct classification are 5.0 or greater for all groups.

**Table S4. Factors Associated with Specific Buprenorphine Trajectories: Multivariate Multinomial Logistic Regression**

| Trajectory Group<br>(Reference: Early initiator with persistent high adherence) | Early initiators                      |                                      |                                       | Late initiators                       |                                      |
|---------------------------------------------------------------------------------|---------------------------------------|--------------------------------------|---------------------------------------|---------------------------------------|--------------------------------------|
|                                                                                 | Moderate-to-high adherence<br>(n=357) | Declining adherence<br>(n=248)       | Early discontinuation<br>(n=393)      | Moderate-to-high adherence<br>(n=318) | Low-to-moderate adherence<br>(n=298) |
|                                                                                 | OR (95% CI)                           | OR (95% CI)                          | OR (95% CI)                           | OR (95% CI)                           | OR (95% CI)                          |
| <b>Sociodemographics</b>                                                        |                                       |                                      |                                       |                                       |                                      |
| Age, year                                                                       | 0.98 (0.95, 1.01)                     | 0.98 (0.95, 1.01)                    | <b>0.94 (0.91, 0.97)<sup>¶</sup></b>  | 0.98 (0.95, 1.02)                     | <b>0.96 (0.92, 0.99)<sup>*</sup></b> |
| Non-white race (ref=white)                                                      | 0.97 (0.48, 1.95)                     | 1.78 (0.92, 3.41)                    | <b>2.16 (1.22, 3.82)<sup>§</sup></b>  | 0.48 (0.20, 1.16)                     | 1.06 (0.51, 2.19)                    |
| Eligible through pregnancy (ref=TANF/others)                                    | <b>2.13 (1.35, 3.37)<sup>§</sup></b>  | 0.69 (0.36, 1.34)                    | 1.41 (0.87, 2.28)                     | <b>2.31 (1.43, 3.72)<sup>§</sup></b>  | 1.63 (0.98, 2.72)                    |
| Resided in non-metropolitan counties (ref=metropolitan counties)                | <b>1.49 (1.08, 2.05)<sup>*</sup></b>  | 1.40 (0.98, 2.02)                    | 1.02 (0.72, 1.44)                     | <b>1.59 (1.12, 2.25)<sup>**</sup></b> | <b>1.50 (1.04, 2.15)<sup>*</sup></b> |
| <b>Health-Status</b>                                                            |                                       |                                      |                                       |                                       |                                      |
| OUD                                                                             | 1.14 (0.76, 1.72)                     | <b>0.67 (0.45, 0.99)<sup>*</sup></b> | <b>0.59 (0.42, 0.84)<sup>*</sup></b>  | 0.88 (0.58, 1.34)                     | 1.00 (0.65, 1.54)                    |
| Other non-opioid drug use disorders                                             | 0.98 (0.70, 1.39)                     | 0.75 (0.52, 1.06)                    | <b>0.72 (0.53, 0.99)<sup>*</sup></b>  | 0.95 (0.66, 1.37)                     | 1.13 (0.77, 1.64)                    |
| Alcohol use disorders                                                           | 0.59 (0.29, 1.20)                     | 0.79 (0.38, 1.67)                    | <b>0.32 (0.14, 0.73)<sup>**</sup></b> | 1.37 (0.73, 2.58)                     | 0.80 (0.40, 1.61)                    |
| Prior buprenorphine use (ref=no MAT therapy)                                    | <b>0.09 (0.06, 0.13)<sup>¶</sup></b>  | <b>0.41 (0.21, 0.64)<sup>¶</sup></b> | <b>0.16 (0.11, 0.24)<sup>¶</sup></b>  | <b>0.04 (0.03, 0.06)<sup>¶</sup></b>  | <b>0.05 (0.03, 0.07)<sup>¶</sup></b> |
| Prior methadone use (ref= no MAT therapy)                                       | 0.66 (0.23, 1.86)                     | 1.12 (0.29, 4.30)                    | 1.07 (0.35, 3.26)                     | 0.85 (0.31, 2.35)                     | 0.67 (0.22, 2.00)                    |
| Prior buprenorphine/methadone use                                               | <b>0.09 (0.05, 0.16)<sup>¶</sup></b>  | <b>0.45 (0.24, 0.84)<sup>*</sup></b> | <b>0.13 (0.07, 0.24)<sup>¶</sup></b>  | <b>0.06 (0.03, 0.11)<sup>¶</sup></b>  | <b>0.04 (0.02, 0.09)<sup>¶</sup></b> |
| Tobacco use                                                                     | 1.12 (0.83, 1.53)                     | 0.83 (0.60, 1.14)                    | 0.80 (0.60, 1.06)                     | 1.19 (0.85, 1.67)                     | 0.96 (0.69, 1.34)                    |

Table S4 (Continued).

| Trajectory Group<br>(Reference: Early initiator with persistent high adherence) | Early initiators                      |                                |                                  | Late initiators                       |                                      |
|---------------------------------------------------------------------------------|---------------------------------------|--------------------------------|----------------------------------|---------------------------------------|--------------------------------------|
|                                                                                 | Moderate-to-high adherence<br>(n=357) | Declining adherence<br>(n=248) | Early discontinuation<br>(n=393) | Moderate-to-high adherence<br>(n=318) | Low-to-moderate adherence<br>(n=298) |
|                                                                                 | OR (95% CI)                           | OR (95% CI)                    | OR (95% CI)                      | OR (95% CI)                           | OR (95% CI)                          |
| <b>Patterns of Health Services Use &amp; Care during Pregnancy</b>              |                                       |                                |                                  |                                       |                                      |
| Prior hospitalization                                                           | 1.22 (0.73, 2.05)                     | <b>2.13 (1.27, 3.58)**</b>     | <b>2.14 (1.34, 3.44)**</b>       | 1.39 (0.81, 2.41)                     | <b>2.49 (1.50, 4.15)¶</b>            |
| No. ED visits                                                                   | 1.04 (1.00, 1.08)                     | 1.04 (1.00, 1.09)              | <b>1.08 (1.04, 1.12)¶</b>        | 1.04 (1.00, 1.09)                     | <b>1.09 (1.05, 1.14)¶</b>            |
| No. Outpatient visits                                                           | 0.99 (0.97, 1.00)                     | <b>0.97 (0.84, 0.99)**</b>     | <b>0.96 (0.94, 0.98)¶</b>        | 0.98 (0.97, 1.00)                     | <b>0.95 (0.93, 0.97)¶</b>            |
| No. monthly other prescriptions                                                 | 1.02 (0.99, 1.06)                     | 0.99 (0.95, 1.03)              | 1.02 (0.99, 1.05)                | 1.00 (0.96, 1.04)                     | 0.97 (0.93, 1.01)                    |
| Mean buprenorphine daily dose                                                   | <b>0.94 (0.92, 0.97)¶</b>             | <b>0.95 (0.92, 0.98)¶</b>      | <b>0.93 (0.90, 0.95)¶</b>        | <b>0.94 (0.91, 0.97)¶</b>             | <b>0.92 (0.90, 0.95)¶</b>            |
| No. buprenorphine prescribers                                                   | <b>1.14 (1.00, 1.30)*</b>             | 1.08 (0.93, 1.25)              | <b>0.43 (0.35, 0.55)¶</b>        | <b>0.82 (0.69, 0.97)*</b>             | <b>0.60 (0.48, 0.74)¶</b>            |
| Having behavioral counseling                                                    | 1.20 (0.90, 1.61)                     | 1.06 (0.76, 1.47)              | 1.25 (0.92, 1.68)                | 1.32 (0.96, 1.81)                     | 1.27 (0.91, 1.76)                    |

\*: P &lt;.05; \*\*: P &lt;.01; ‡: P &lt;.001; ¶: P &lt;.0001

Abbreviations: OUD: opioid use disorders; TANF: Temporary Assistance for the Needy Families

**Table S5. Factors Associated with Specific Buprenorphine Trajectories: Multivariate Multinomial Logistic Regression (Sensitivity Analysis Excluding Health Services Use Factors)**

|                                                                                 | Early initiators                      |                                      |                                       | Late initiators                       |                                      |
|---------------------------------------------------------------------------------|---------------------------------------|--------------------------------------|---------------------------------------|---------------------------------------|--------------------------------------|
| Trajectory Group<br>(Reference: Early initiator with persistent high adherence) | Moderate-to-high adherence<br>(n=357) | Declining adherence<br>(n=248)       | Early discontinuation<br>(n=393)      | Moderate-to-high adherence<br>(n=318) | Low-to-moderate adherence<br>(n=298) |
|                                                                                 | OR (95% CI)                           | OR (95% CI)                          | OR (95% CI)                           | OR (95% CI)                           | OR (95% CI)                          |
| <b>Sociodemographics</b>                                                        |                                       |                                      |                                       |                                       |                                      |
| Age, year                                                                       | 0.98 (0.95, 1.01)                     | 0.98 (0.94, 1.01)                    | <b>0.94 (0.92, 0.97)<sup>¶</sup></b>  | 0.98 (0.95, 1.01)                     | <b>0.96 (0.92, 0.99)<sup>*</sup></b> |
| Non-white race (ref=white)                                                      | 1.05 (0.52, 2.11)                     | <b>1.91 (1.01, 3.65)<sup>*</sup></b> | <b>2.52 (1.44, 4.41)<sup>§</sup></b>  | 0.51 (0.22, 1.23)                     | 1.19 (0.58, 2.43)                    |
| Eligible through pregnancy (ref=TANF/others)                                    | <b>1.96 (1.24, 3.08)<sup>§</sup></b>  | 0.65 (0.34, 1.26)                    | 1.25 (0.78, 2.01)                     | <b>2.22 (1.39, 3.55)<sup>§</sup></b>  | 1.58 (0.96, 2.60)                    |
| Resided in non-metropolitan counties (ref=metropolitan counties)                | <b>1.39 (1.02, 1.90)<sup>*</sup></b>  | 1.26 (0.89, 1.80)                    | 0.87 (0.62, 1.22)                     | <b>1.50 (1.07, 2.11)<sup>**</sup></b> | 1.34 (0.95, 1.90)                    |
| <b>Health-Status</b>                                                            |                                       |                                      |                                       |                                       |                                      |
| ODD                                                                             | 1.13 (0.75, 1.70)                     | <b>0.65 (0.44, 0.96)<sup>*</sup></b> | <b>0.58 (0.41, 0.81)<sup>*</sup></b>  | 0.87 (0.57, 1.32)                     | 0.96 (0.63, 1.46)                    |
| Other non-opioid drug use disorders                                             | 1.00 (0.71, 1.40)                     | 0.74 (0.52, 1.05)                    | <b>0.73 (0.54, 0.99)<sup>*</sup></b>  | 0.97 (0.67, 1.39)                     | 1.12 (0.77, 1.61)                    |
| Alcohol use disorders                                                           | 0.68 (0.34, 1.36)                     | 0.93 (0.45, 1.93)                    | <b>0.42 (0.19, 0.95)<sup>**</sup></b> | 1.55 (0.83, 2.88)                     | 1.01 (0.51, 2.01)                    |
| Prior buprenorphine use (ref=no MAT therapy)                                    | <b>0.09 (0.06, 0.13)<sup>¶</sup></b>  | <b>0.42 (0.27, 0.66)<sup>¶</sup></b> | <b>0.17 (0.12, 0.24)<sup>¶</sup></b>  | <b>0.04 (0.03, 0.06)<sup>¶</sup></b>  | <b>0.05 (0.03, 0.07)<sup>¶</sup></b> |
| Prior methadone use (ref= no MAT therapy)                                       | 0.66 (0.23, 1.88)                     | 1.10 (0.29, 4.18)                    | 1.16 (0.39, 3.44)                     | 0.84 (0.31, 2.29)                     | 0.70 (0.24, 2.06)                    |
| Prior buprenorphine/methadone use                                               | <b>0.10 (0.06, 0.17)<sup>¶</sup></b>  | <b>0.50 (0.27, 0.91)<sup>*</sup></b> | <b>0.14 (0.07, 0.25)<sup>¶</sup></b>  | <b>0.06 (0.03, 0.11)<sup>¶</sup></b>  | <b>0.05 (0.02, 0.10)<sup>¶</sup></b> |
| Tobacco use                                                                     | 1.18 (0.87, 1.60)                     | 0.86 (0.63, 1.17)                    | 0.86 (0.65, 1.14)                     | 1.25 (0.89, 1.74)                     | 0.98 (0.71, 1.36)                    |

Table S5 (Continued).

| Trajectory Group<br>(Reference: Early initiator with persistent high adherence) | Early initiators                      |                                      |                                      | Late initiators                       |                                      |
|---------------------------------------------------------------------------------|---------------------------------------|--------------------------------------|--------------------------------------|---------------------------------------|--------------------------------------|
|                                                                                 | Moderate-to-high adherence<br>(n=357) | Declining adherence<br>(n=248)       | Early discontinuation<br>(n=393)     | Moderate-to-high adherence<br>(n=318) | Low-to-moderate adherence<br>(n=298) |
|                                                                                 | OR (95% CI)                           | OR (95% CI)                          | OR (95% CI)                          | OR (95% CI)                           | OR (95% CI)                          |
| <b>Patterns of Care during Pregnancy</b>                                        |                                       |                                      |                                      |                                       |                                      |
| Mean buprenorphine daily dose                                                   | <b>0.95 (0.92, 0.97)<sup>¶</sup></b>  | <b>0.95 (0.93, 0.98)<sup>¶</sup></b> | <b>0.93 (0.91, 0.96)<sup>¶</sup></b> | <b>0.94 (0.92, 0.97)<sup>¶</sup></b>  | <b>0.93 (0.90, 0.95)<sup>¶</sup></b> |
| No. buprenorphine prescribers                                                   | 1.13 (0.99, 1.29)                     | 1.05 (0.91, 1.22)                    | <b>0.43 (0.34, 0.54)<sup>¶</sup></b> | <b>0.81 (0.69, 0.96)<sup>*</sup></b>  | <b>0.57 (0.46, 0.71)<sup>¶</sup></b> |
| Having behavioral counseling                                                    | 1.23 (0.93, 1.65)                     | 1.04 (0.75, 1.43)                    | 1.24 (0.92, 1.66)                    | 1.33 (0.97, 1.82)                     | 1.19 (0.86, 1.65)                    |

\*: P &lt;.05; \*\*: P &lt;.01; §: P &lt;.001; ¶: P &lt;.0001

Abbreviations: OUD: opioid use disorders; TANF: Temporary Assistance for the Needy Families



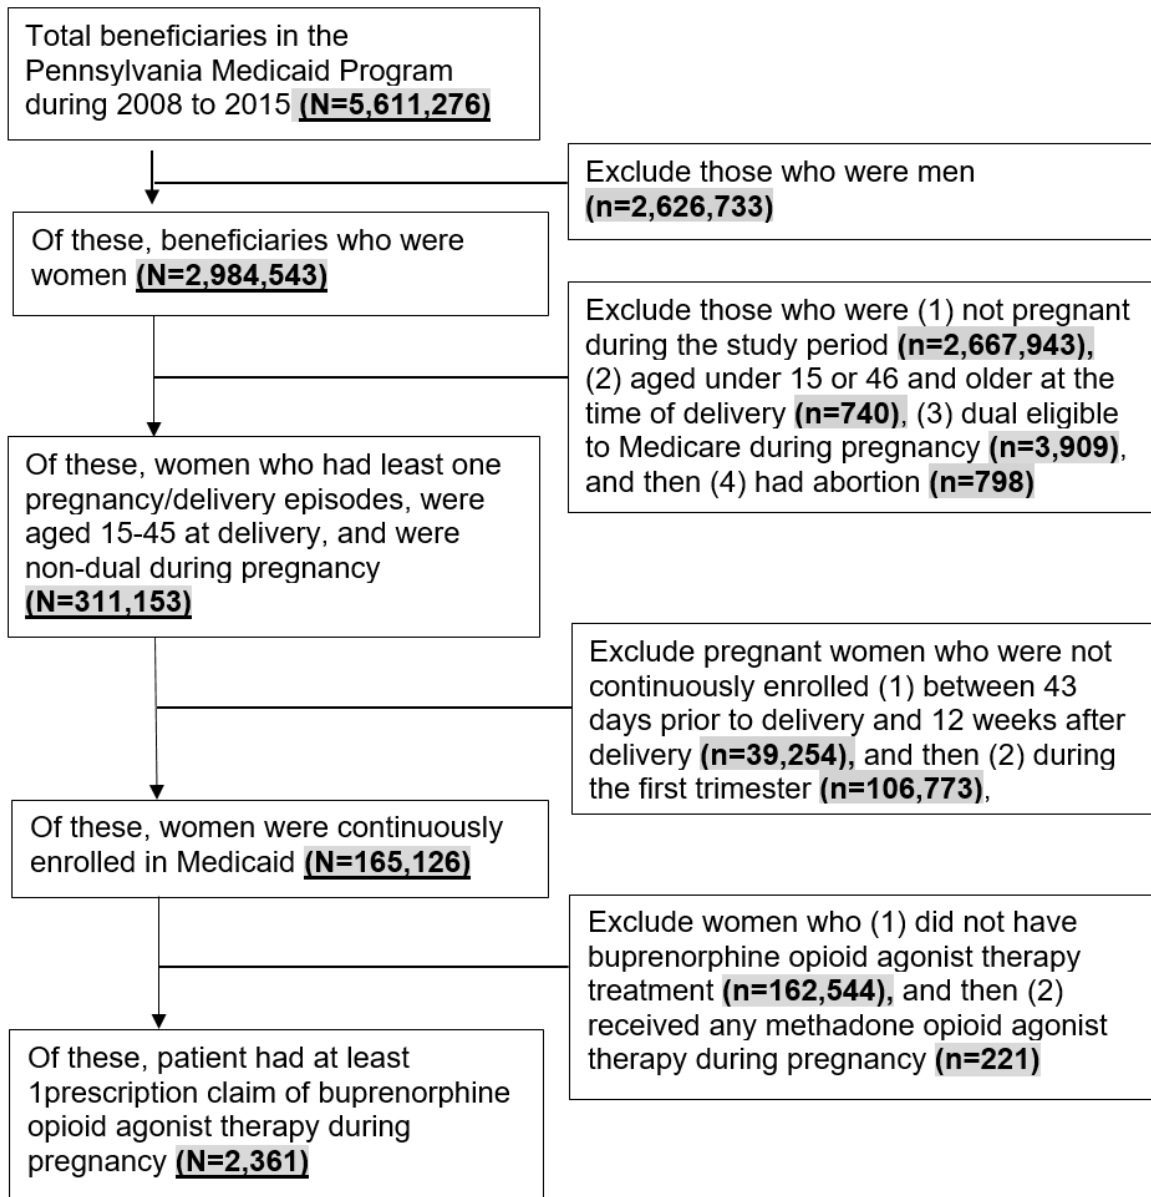

**Figure S1. Sample Size Flow Chart**

Note: Among the final 2,361 women, if there were multiple pregnancies during the study period with at least 1 buprenorphine fill in each pregnancy, we considered their first pregnancy only.
